# Supplementary material for: In silico identification of essential proteins in Corynebacterium pseudotuberculosis based on protein-protein interaction networks
Source: PubMed Central journal article supplement (PMC5097352; doi:10.1186/s12918-016-0346-4), 2016-11-04
Supplement: 12918_2016_346_MOESM2_ESM.pdf [file 12918_2016_346_MOESM2_ESM.pdf]

## Additional File 2

**Shortest path and degree distribution analysis.** Shortest Path analysis of the nine *Corynebacterium pseudotuberculosis* serovar ovis strains (Figure 1-9). Degree distribution analysis of the nine *C. pseudotuberculosis* serovar ovis strains. The red line indicate the perfect power-law distribution (Figure 10-18).

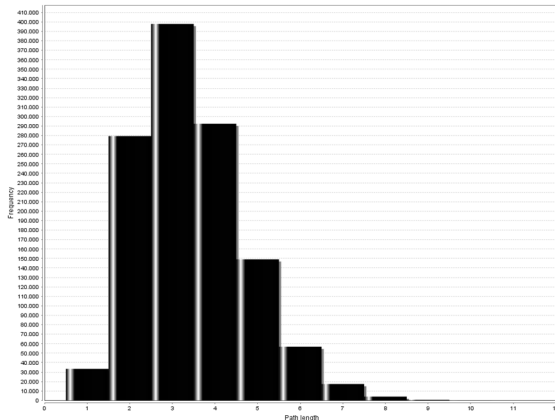

**Figure 1 - Cp1002 Shortest Path analysis**

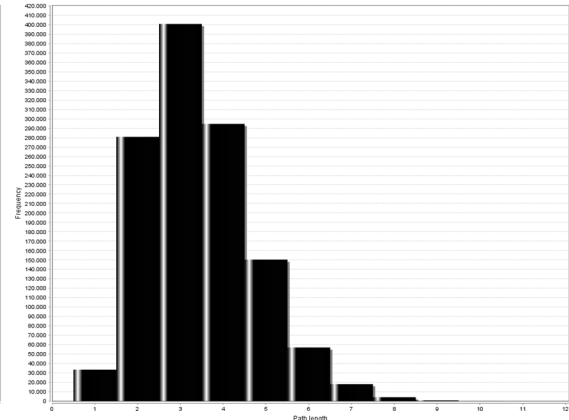

**Figure 2 - Cp267 Shortest Path analysis**

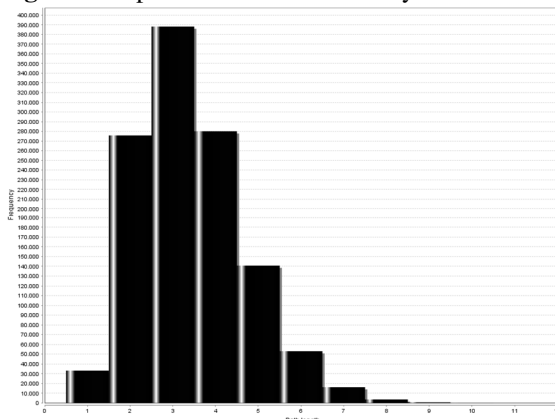

**Figure 3 - Cp3995 Shortest Path analysis**

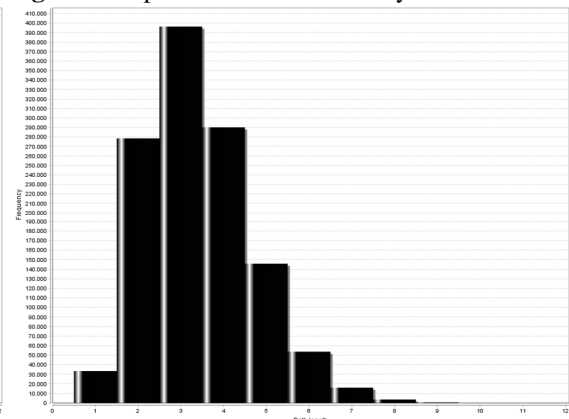

**Figure 4 - Cp4202 Shortest Path analysis**

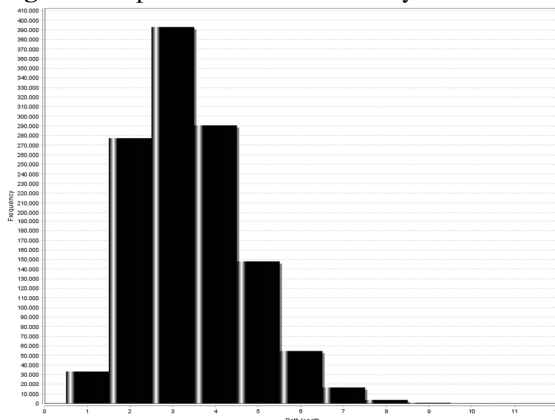

**Figure 5 - CpC231 Shortest Path analysis**

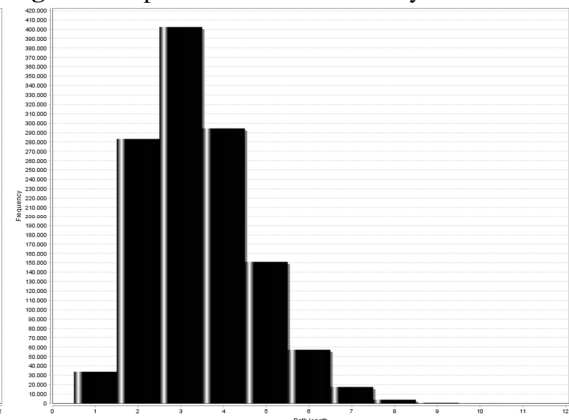

**Figure 6 - Cpfrc Shortest Path analysis**

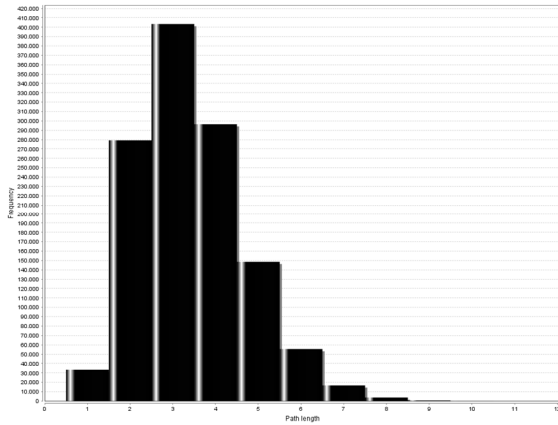

**Figure 7 - Cp119 Shortest Path analysis**

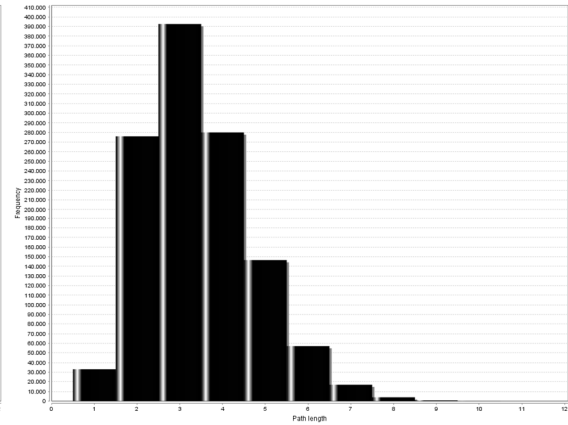

**Figure 8 - CpP54B96 Shortest Path analysis**

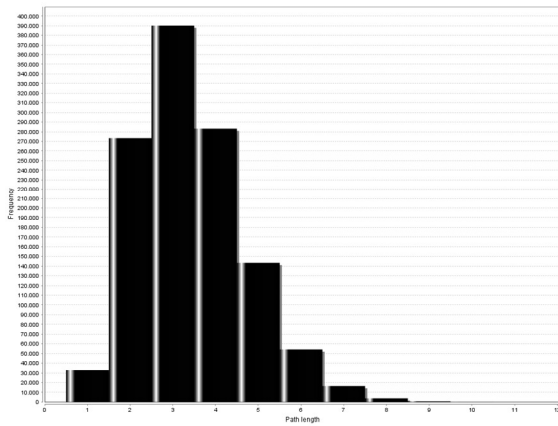

**Figure 9 - CpPAT10 Shortest Path analysis**

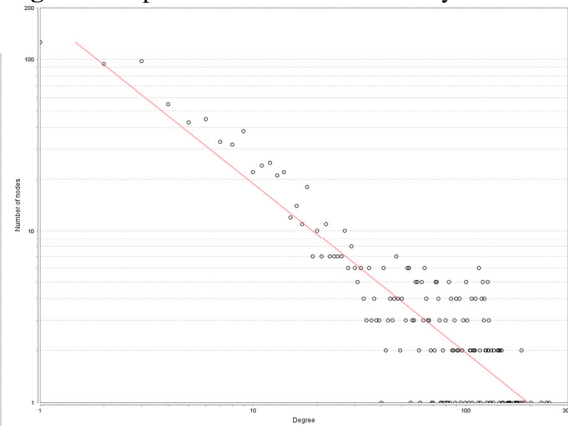

**Figure 10 - CpPAT10 Degree distribution analysis.** Clustering coefficient = 0.407, Correlation = 0.938, R-Squared = 0.790, Shapiro-Wilk test = p-value < 2.2e-16.

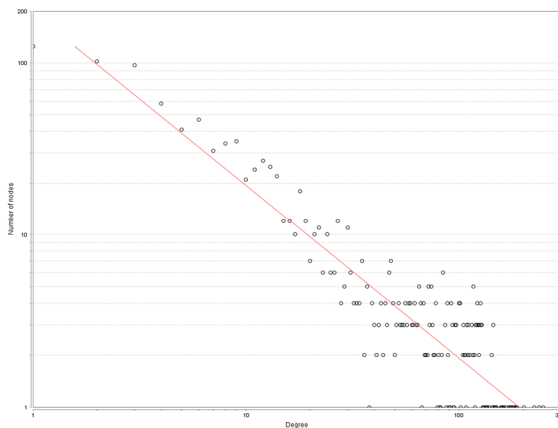

**Figure 11 - Cp1002 Degree distribution analysis.** Clustering coefficient = 0.408, Correlation = 0.933, R-Squared = 0.822, Shapiro-Wilk test = p-value < 2.2e-16.

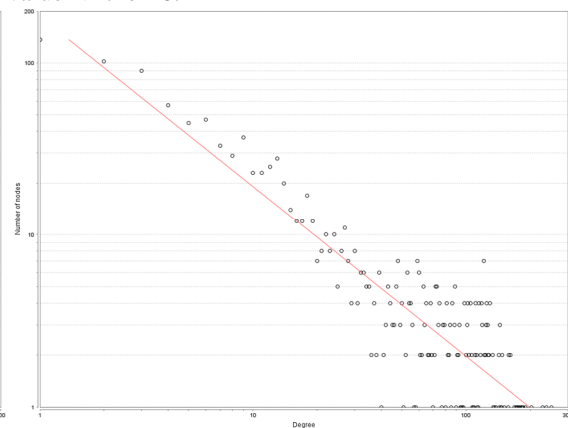

**Figure 12 - Cp267 Degree distribution analysis.** Clustering coefficient = 0.402, Correlation = 0.953, R-Squared = 0.785, Shapiro-Wilk test = p-value < 2.2e-16.

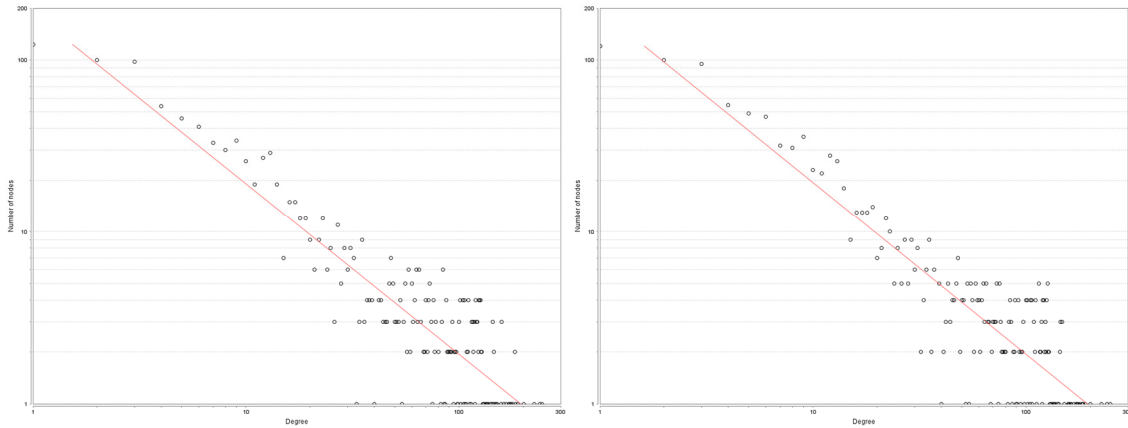

**Figure 13 - Cp3995 Degree distribution analysis.** Clustering coefficient = 0.410, Correlation = 0.933, R-Squared = 0.798, Shapiro-Wilk test = p-value < 2.2e-16.  
**Figure 14 - Cp4202 Degree distribution analysis.** Clustering coefficient = 0.410, Correlation = 0.928, R-Squared = 0.799, Shapiro-Wilk test = p-value < 2.2e-16.

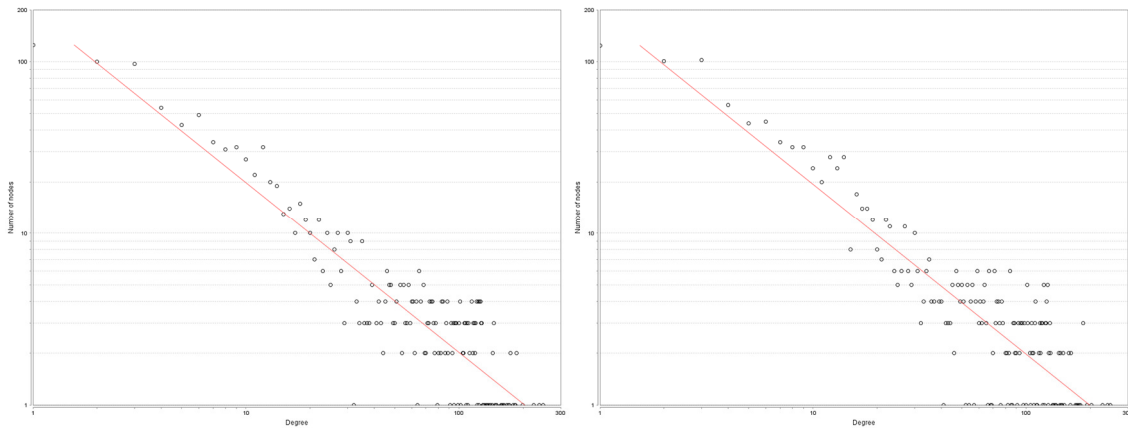

**Figure 15 - CpC231 Degree distribution analysis.** Clustering coefficient = 0.407, Correlation = 0.936, R-Squared = 0.825, Shapiro-Wilk test = p-value < 2.2e-16.  
**Figure 16 - Cpfrc Degree distribution analysis.** Clustering coefficient = 0.408, Correlation = 0.930, R-Squared = 0.786, Shapiro-Wilk test = p-value < 2.2e-16.

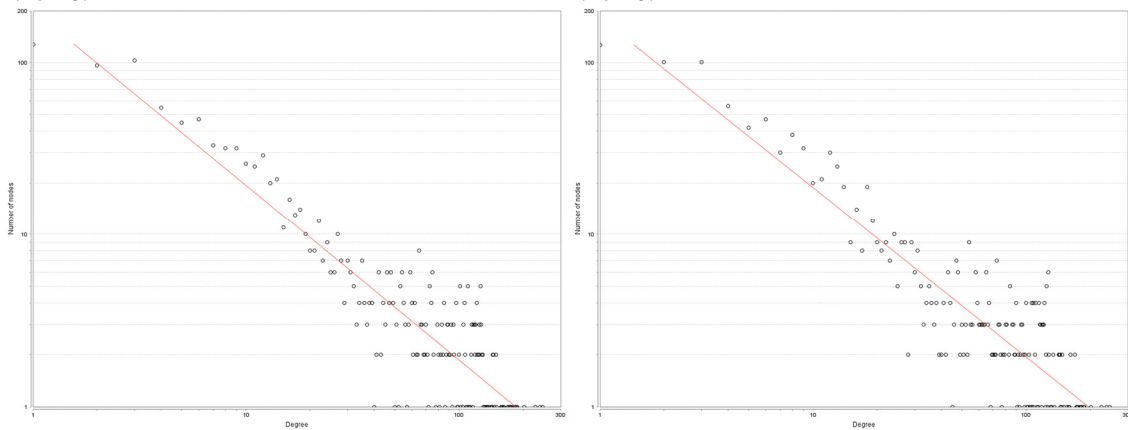

**Figure 17 - CpI19 Degree distribution analysis.** Clustering coefficient = 0.403, Correlation = 0.932, R-Squared = 0.813, Shapiro-Wilk test = p-value < 2.2e-16.  
**Figure 18 - CpP54B96 Degree distribution analysis.** Clustering coefficient = 0.404, Correlation = 0.935, R-Squared = 0.800, Shapiro-Wilk test = p-value < 2.2e-16.
